# Supplementary material for: Remotely tunable microfluidic platform driven by nanomaterial-mediated on-demand photothermal pumping
Source: Royal Society of Chemistry journal article supplement (doi:10.1039/d0lc00317d), 2020-01-01
Supplement: d0lc00317d2.pdf [file d0lc00317d2.pdf]

Electronic Supplementary Material (ESI) for Lab on a Chip.  
This journal is © The Royal Society of Chemistry 2019

## Supporting Information

### Remotely tunable microfluidic platform driven by nanomaterial-mediated on-demand photothermal pumping

Guanglei Fu,<sup>‡ a,b</sup> Wan Zhou,<sup>‡ a</sup> and XiuJun Li <sup>\*a,c,d,e</sup>

<sup>a</sup> *Department of Chemistry and Biochemistry, University of Texas at El Paso, 500 West University Ave, El Paso, Texas, 79968, USA.*

<sup>b</sup> *Biomedical Engineering Research Center, Medical School of Ningbo University, Ningbo, Zhejiang, 315211, P. R. China*

<sup>c</sup> *Biomedical Engineering, University of Texas at El Paso, 500 West University Ave, El Paso, Texas, 79968, USA.*

<sup>d</sup> *Border Biomedical Research Center, University of Texas at El Paso, 500 West University Ave, El Paso, Texas, 79968, USA.*

<sup>e</sup> *Environmental Science and Engineering, University of Texas at El Paso, 500 West University Ave, El Paso, Texas, 79968, USA.*

\*Corresponding author: XiuJun Li, [xli4@utep.edu](mailto:xli4@utep.edu)

<sup>‡</sup>These authors contributed equally to the work

## Additional Experimental Details

### Synthesis of Fe<sub>3</sub>O<sub>4</sub> NPs-secondary antibody conjugates

The Fe<sub>3</sub>O<sub>4</sub> NPs-secondary antibody conjugates were synthesized as per previously published protocols with slight modification.<sup>1,2</sup> Basically, *N*-hydroxysulfosuccinimide (Sulfo-NHS, 25 mg/mL) and 1-ethyl-3-[3-dimethylaminopropyl]carbodiimide hydrochloride (EDC·HCl, 30 mg/mL) were added to the Fe<sub>3</sub>O<sub>4</sub> NPs dispersion (0.25 mg/mL), followed by reaction at room temperature for 40 min. Then 40 µg of polyclonal PSA secondary antibody was added into the nanoparticle dispersion, and reacted for 2 h on an orbital shaker. The nanoparticle dispersion was centrifuged at 12,000 rpm for 10 min and washed with phosphate buffer saline (PBS, pH 7.4, 0.01 M) three times. The as-produced Fe<sub>3</sub>O<sub>4</sub> NPs-secondary antibody conjugates were dispersed in 1 mL PBS buffer and stored at 4 °C before use.

### Immunosensing procedures

In a typical sandwich enzyme-linked immunosorbent assay (ELISA), 120 µL of monoclonal PSA primary antibody (30 µg/mL) was added in a PCR tube, followed by overnight incubation at 4 °C. After washing the tube with PBS buffer for three times, 200 µL of 5% BSA was added and incubated for 30 min at 37 °C in order to block remaining active sites. Then 120 µL of PSA solutions with different concentrations from 0 to 64 ng·mL<sup>-1</sup> were added to each tube and incubated for 1 h at 37 °C, followed by washing steps. 120 µL of freshly synthesized Fe<sub>3</sub>O<sub>4</sub> NPs-secondary antibody conjugates were added and incubated at 37 °C for 1 h, after which the tube was washed thoroughly with PBS buffer.

### Nanoparticles transformation

According to the previous work published from our group,<sup>1,2</sup> a weak photothermal agent, Fe<sub>3</sub>O<sub>4</sub> NPs (captured in the sandwich immunoassay system), was herein transformed into a strong photothermal agent, Prussian blue (PB) NPs. Briefly, 120 µL of HCl solution (0.1 M) was added into the above tube, followed by ultrasonication for 1 h at room temperature. Potassium ferrocyanide aqueous solutions (30 µL, 90 mM) were then added into each tube, followed by vigorous mixing for 1 h. Finally, the PB NPs were produced via the ferric ferrocyanide reaction under acidic conditions.

### Visual quantitative immunosensing using the PT-Chip

The above PB NPs captured in the immunoassay were pipetted to the photothermal bar-chart chip (PT-Chip) for visual quantitative detection of PSA. In detail, 30 µL of the above solution was loaded into each reservoir on the PT-Chip, along with 2 µL of food dye solution (a deep blue color for better observation of bar chart movement). All reservoirs on a single chip were then irradiated simultaneously under an 808 nm NIR diode laser at a power density of 2.2 W·cm<sup>-2</sup>. With the increasing heat generated under the laser irradiation (up to 5 min), vapor pressure accumulated inside the PT-Chip,

which pumped the solutions to microchannels and displayed bar chart movement. Therefore, the visual quantitative detection of PSA was achieved by simply recording the bar-chart pumping distances of the immunosensing solutions, which were conveniently read by using an on-chip ruler from the PT-Chip.

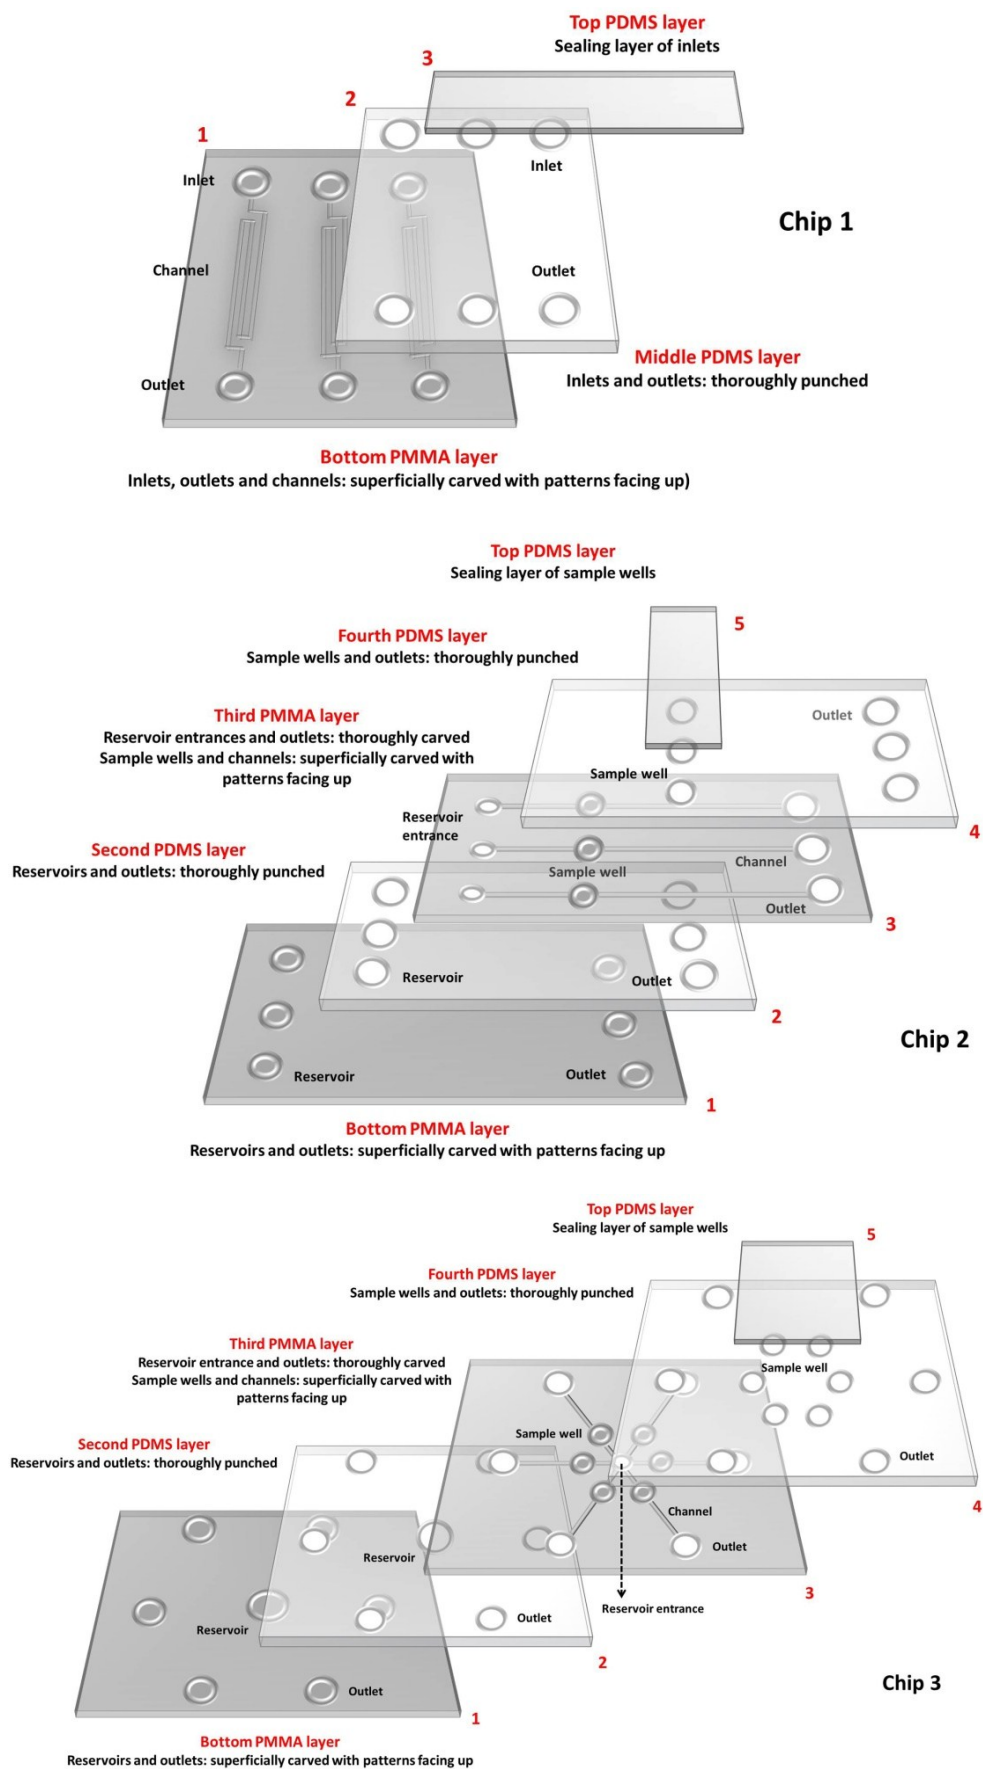

**Figure S1.** Schematic illustration of structures of **Chip 1**, **Chip 2**, and **Chip 3**.

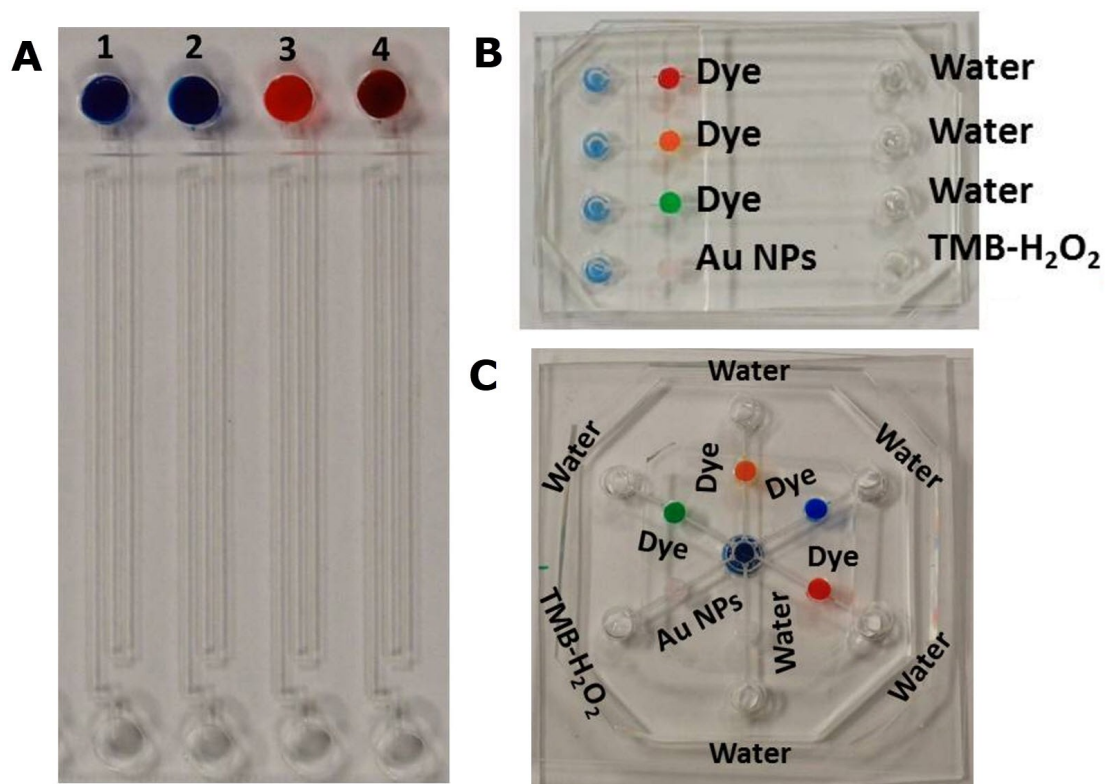

**Figure S2.** Photographs of (A) **Chip 1**, (B) **Chip 2**, and (C) **Chip 3**.

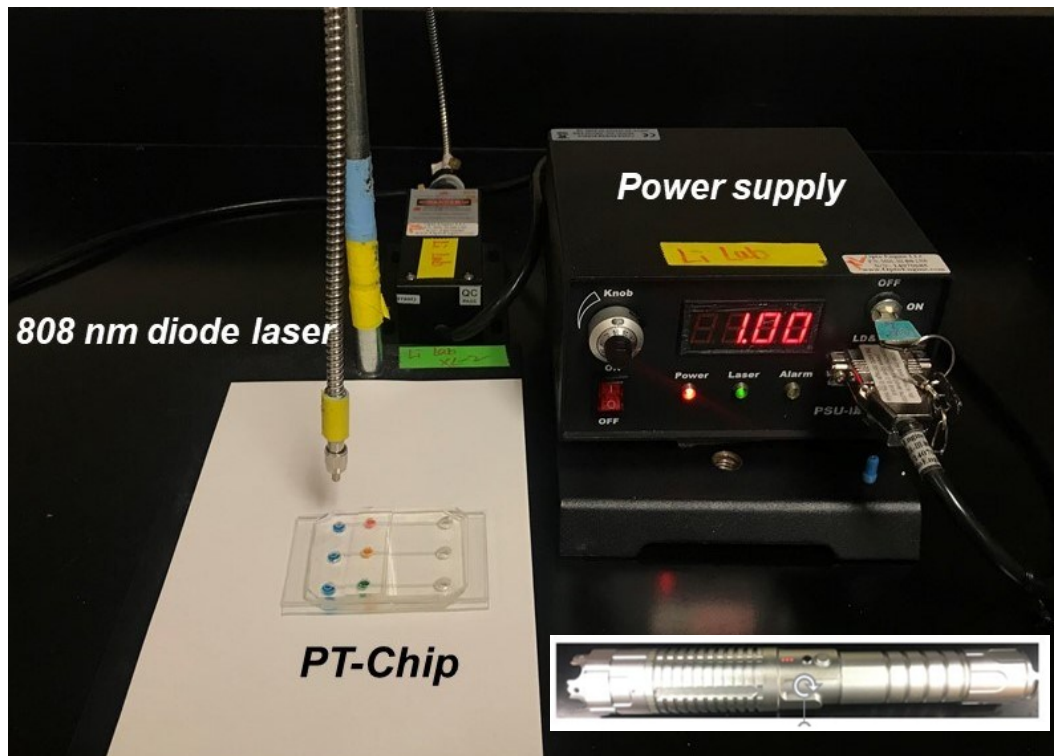

**Figure S3.** Photograph of the platform setup including the laser and the PT-Chip. The inset is a NIR laser pointer.

## References

1. G. Fu, S. T. Sanjay, W. Zhou, R. A. Brekken, R. A. Kirken and X. Li, *Anal. Chem.*, 2018, **90**, 5930-5937.
2. G. L. Fu, S. T. Sanjay, M. W. Dou and X. J. Li, *Nanoscale*, 2016, **8**, 5422-5427.
